# Supplementary material for: Ultra-Processed Food Consumption and Adult Mortality Risk: A Systematic Review and Dose–Response Meta-Analysis of 207,291 Participants
Source: MDPI journal article supplement (doi:10.3390/nu14010174), 2021-12-30
Supplement: s1 [file s1]

**Table S1.** Search strategies including the key terms and the queries for each database.

| Database<br>8/8/2021       | key terms and the queries                                                                                                                                                                                                                                                                                                                                                                                                                                                                                                                                                                                                                                                                                                                           |
|----------------------------|-----------------------------------------------------------------------------------------------------------------------------------------------------------------------------------------------------------------------------------------------------------------------------------------------------------------------------------------------------------------------------------------------------------------------------------------------------------------------------------------------------------------------------------------------------------------------------------------------------------------------------------------------------------------------------------------------------------------------------------------------------|
| PubMed<br>(n=4827)         | <p>#1 ("fast foods"[All Fields] OR "fast foods"[MeSH Terms] OR "ultra processed food*"[All Fields] OR "ultraprocessed food*"[All Fields] OR "ultra processed food*"[All Fields] OR "processed food*"[All Fields] OR "ultra-processed"[All Fields] OR "ultraprocessed"[All Fields] OR "ultra-processed"[All Fields] OR "NOVA"[All Fields] OR "nova food classif*"[All Fields] OR "nova food*"[All Fields] OR "nova food classif*"[All Fields] OR "NOVA food classification system"[All Fields])</p> <p>#2 ("Mortality"[MeSH Terms] OR "Mortality"[Title/Abstract] OR "Death"[Title/Abstract] OR "Fatal"[Title/Abstract] OR "survive"[Title/Abstract] OR "survival"[Title/Abstract])</p> <p>#3 #1 AND #2</p>                                          |
| Web of Science<br>(n=1763) | <p>#1 TOPIC: ("fast foods") OR TOPIC: ("ultra processed food*") OR TOPIC: ("ultraprocessed food*") OR TOPIC: ("ultra processed food*") OR TOPIC: ("processed food*") OR TOPIC: ("ultra-processed") OR TOPIC: ("ultraprocessed") OR TOPIC: ("ultra-processed") OR TOPIC: ("NOVA") OR TOPIC: ("nova food classif*") OR TOPIC: ("nova food*") OR TOPIC: ("nova food classif*") OR TOPIC: ("NOVA food classification system")</p> <p>#2 TOPIC: ("Mortality") OR TOPIC: ("death") OR TOPIC: ("Fatal") OR TOPIC: ("survive") OR TOPIC: ("survival")</p> <p>#3 #1 AND #2</p>                                                                                                                                                                               |
| Scopus<br>(n=5547)         | <p>#1 ( TITLE-ABS-KEY ( "ultra-processed food*" ) OR TITLE-ABS-KEY ( "ultraprocessed food*" ) OR TITLE-ABS-KEY ( "ultra processed food*" ) OR TITLE-ABS-KEY ( "processed food*" ) OR TITLE-ABS-KEY ( "ultra processed" ) OR TITLE-ABS-KEY ( "ultraprocessed" ) OR TITLE-ABS-KEY ( "ultra-processed" ) OR TITLE-ABS-KEY ( "NOVA" ) OR TITLE-ABS-KEY ( "NOVA food classif*" ) OR TITLE-ABS-KEY ( "NOVA food*" ) OR TITLE-ABS-KEY ( "NOVA food classif*" ) OR TITLE-ABS-KEY ( "NOVA food classification system" ) OR TITLE-ABS-KEY ( "fast foods" ) )</p> <p>#2 ( ( TITLE-ABS-KEY ( "Mortality" ) OR TITLE-ABS-KEY ( "Death" ) OR TITLE-ABS-KEY ( "Fatal" ) OR TITLE-ABS-KEY ( "survive" ) OR TITLE-ABS-KEY ( "survival" ) ) )</p> <p>#3 #1 AND #2</p> |

**Table S2.** Description of population, intervention, comparator and outcome (PICO).

|                     |                                  |
|---------------------|----------------------------------|
| <b>Population</b>   | Adults ( $\geq 18$ years)        |
| <b>Intervention</b> | -                                |
| <b>Comparison</b>   | Ultra-processed Food Consumption |
| <b>Outcome</b>      | Mortality Risk                   |
